# Supplementary material for: Association of COVID-19 risk factors with systemic fungal infections in hospitalized patients
Source: bioRxiv or medRxiv preprint supplement (doi:10.1101/2024.10.10.24315254), 2024-10-11
Supplement: Supplementary file [file media-1.pdf]

## **Supporting Information**

### **Association of COVID-19 risk factors with systemic fungal infections in hospitalized patients**

Abbygail C. Wilbourn,<sup>a,\*</sup> Oleg V. Tsodikov,<sup>a,\*</sup> and Sylvie Garneau-Tsodikova <sup>a,\*</sup>

<sup>a</sup> University of Kentucky, College of Pharmacy, 789 South Limestone St., Lexington, KY, 40536-0596, USA.

\* Correspondence to: [spency05@gmail.com](mailto:spency05@gmail.com) or [oleg.tsodikov@uky.edu](mailto:oleg.tsodikov@uky.edu) or [sylvieghtsodikova@uky.edu](mailto:sylvieghtsodikova@uky.edu)

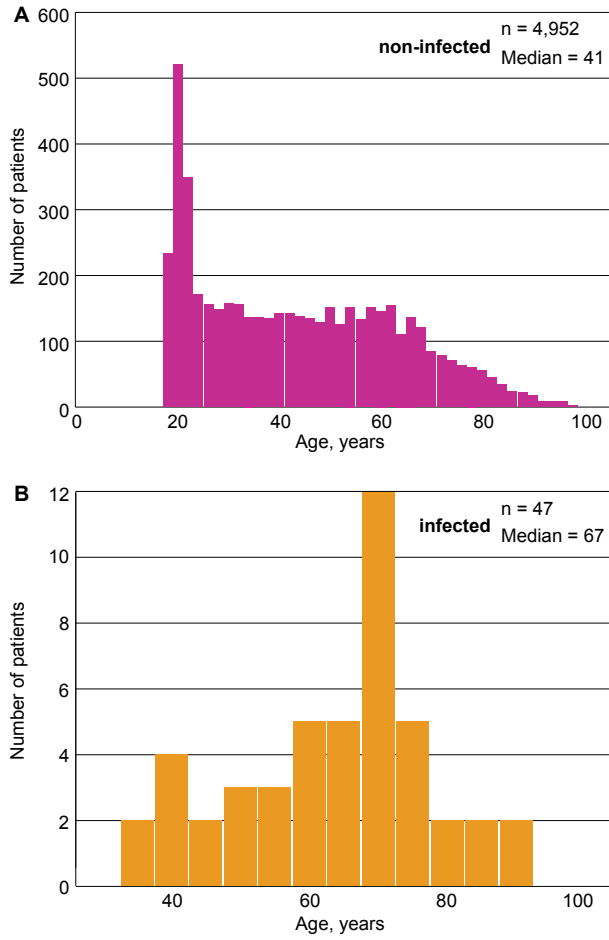

**Figure S1.** The age distribution of the patients. **A.** The age distribution in the non-infected group (pink bars). **B.** The age distribution in the infected group (orange bars).

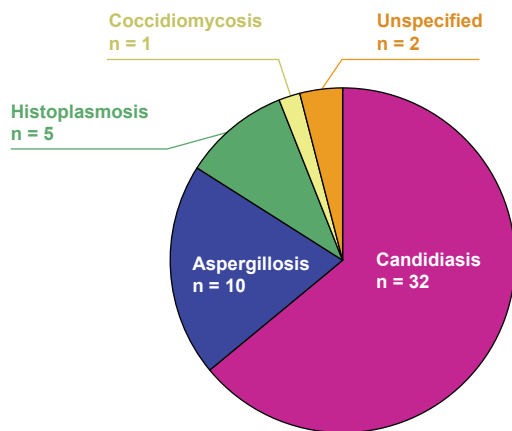

**Figure S2.** The incidence of systemic fungal infections in this study, grouped by the fungal pathogen.

## Tables

**Table S1.** Characteristics of the patients without and with systemic fungal infections.

|                                                      | 4,952 COVID-19 patients without fungal infection | 47 COVID-19 patients with fungal infection |
|------------------------------------------------------|--------------------------------------------------|--------------------------------------------|
| Gender, male n (%), p = 0.194                        | 2267 (46%)                                       | 26 (55%)                                   |
| Race, white n (%)*, p = 0.009                        | 3734 (75%)                                       | 44 (94%)                                   |
| Median age in years (IQR)*, p <0.001                 | 41 (35)                                          | 67 (18)                                    |
| Median height in cm (IQR), p = 0.227                 | 170.0 (15.3)                                     | 170.1 (13.4)                               |
| Median weight in kg (IQR), p = 0.745                 | 85.2 (32.6)                                      | 87.6 (33.7)                                |
| Admit to ICU, n, (%)*, p <0.001                      | 222 (4%)                                         | 20 (43%)                                   |
| Transferred from another hospital, n (%)*, p <0.001  | 572 (12%)                                        | 30 (64%)                                   |
| Median length of hospital stay in h (IQR)*, p <0.001 | 12 (34)                                          | 524 (575)                                  |

Abbreviations: ICU = intensive care unit, IQR = interquartile range.  
\* = statistically significant difference between the two groups

**Table S2.** Clinical characteristics of the patients without and with systemic fungal infections.

|                                                                | 4,952 COVID-19 patients without fungal infection | 47 COVID-19 patients with fungal infection |
|----------------------------------------------------------------|--------------------------------------------------|--------------------------------------------|
| Mechanically ventilated hospitalizations, n (%)*, p <0.001     | 339 (6.8%)                                       | 29 (62%)                                   |
| Median duration of mechanical ventilation, h (IQR)*, p < 0.001 | 208 (316)                                        | 488 (579)                                  |
| Diabetes mellitus, n (%)*, p <0.001                            | 616 (12%)                                        | 24 (51%)                                   |
| Cardiovascular disease, n (%)*, p <0.001                       | 684 (14%)                                        | 26 (55%)                                   |
| Obesity, n (%)*, p <0.001                                      | 337 (7%)                                         | 14 (28%)                                   |
| Mortality, n (%)*, p < 0.001                                   |                                                  |                                            |
| In hospital*, OR = 11.0 (95% C.I.: 5.9-20.7)                   | 202 (4%)                                         | 15 (32%)                                   |
| 30-day post-discharge*, OR = 12.1 (95% C.I.: 6.5-22.2)         | 222 (4.5%)                                       | 17 (36%)                                   |
| 90-day post-discharge*, OR = 12.3 (95% C.I.: 6.8-22.6)         | 237 (4.8%)                                       | 18 (38%)                                   |

\* = statistically significant difference between the two groups; OR = odds ratio; C.I. = confidence interval.

**Table S3.** COVID-19 therapy administrations.

| COVID therapy      | 4,952 COVID-19 patients without fungal infection |              | 47 COVID-19 patients with fungal infection |              |
|--------------------|--------------------------------------------------|--------------|--------------------------------------------|--------------|
|                    | Administrations (per patient)                    | Patients (%) | Administrations (per patient)              | Patients (%) |
| Remdesivir         | 2914 (5)                                         | 590 (12%)    | 110 (6)                                    | 18 (32%)     |
| Tocilizumab        | 27 (1)                                           | 27 (0.5%)    | 0 (0)                                      | 0 (0)        |
| Dexamethasone      | 5472 (7)                                         | 831 (17%)    | 357 (11)                                   | 32 (68%)     |
| Prednisone         | 1131 (8)                                         | 138 (3%)     | 141 (11)                                   | 13 (28%)     |
| Methylprednisolone | 2059 (14)                                        | 153 (3%)     | 213 (18)                                   | 12 (26%)     |
| Fludrocortisone    | 140 (7)                                          | 21 (0.4%)    | 12 (4)                                     | 3 (6%)       |
| Hydrocortisone     | 1119 (10)                                        | 109 (2%)     | 227 (18)                                   | 13 (28%)     |
| Prednisolone       | 12 (6)                                           | 2 (0.04%)    | 0 (0)                                      | 0 (0)        |

**Table S4.** Steroid administration in dexamethasone equivalents.

|                                               | 4,952 COVID-19 patients without fungal infection | 47 COVID-19 patients with fungal infection |
|-----------------------------------------------|--------------------------------------------------|--------------------------------------------|
| Total mg median (IQR)*, p <0.001              | 42 (48)                                          | 95.25 (257)                                |
| Max total mg                                  | 2209                                             | 1081.5                                     |
| Min total mg                                  | 1.5                                              | 7.5                                        |
| Total administrations median (IQR)*, p <0.001 | 7 (7)                                            | 13 (28.25)                                 |
| Max total administrations                     | 225                                              | 92                                         |
| Min total administrations                     | 1                                                | 1                                          |

\* = statistically significant difference.

|                      | <b>4,952 COVID-19 patients without fungal infection</b> |                     | <b>47 COVID-19 patients with fungal infection</b> |                     |
|----------------------|---------------------------------------------------------|---------------------|---------------------------------------------------|---------------------|
| Vaccine manufacturer | <i>All vaccinations</i>                                 | <i>Patients (%)</i> | <i>All vaccinations</i>                           | <i>Patients (%)</i> |
| Pfizer-BioNTech      | 409                                                     | 308 (6.2%)          | 0                                                 | 0                   |
| Moderna              | 152                                                     | 111 (2.2%)          | 0                                                 | 0                   |
| Janssen              | 5                                                       | 5 (0.1%)            | 0                                                 | 0                   |

| <b>Predictor</b>                                    | <b>OR all infections</b>                | <b>OR candidiasis</b>               | <b>OR aspergillosis</b>                         |
|-----------------------------------------------------|-----------------------------------------|-------------------------------------|-------------------------------------------------|
| Age, $\geq 50 / < 50$                               | 7.9 (3.7-16.9) <sup>a</sup> , p < 0.001 | 16 (5-51), p < 0.001                | 14 (2-114), p = 0.011                           |
| Race, white/other                                   | 4.8 (1.5-15.4), p = 0.009               | 4.9 (1.2-20.4), p = 0.03            | p = 0.3                                         |
| ICU admission                                       | 16 (9-29), p < 0.001                    | 12 (6-26), p < 0.001                | 81 (17-385), p < 0.001                          |
| Mechanical ventilation status                       | 22 (12-40), p < 0.001                   | 17 (8-34), p < 0.001                | 51 (11-243), p < 0.001                          |
| Length of hospital stay, $\geq 13$ days / < 13 days | 42 (21-83), p < 0.001                   | 32 (15-70), p < 0.001               | $+\infty$ ; * all infected patients $\geq 13$ d |
| Diabetes mellitus                                   | 7.3 (4.1-13.1), p < 0.001               | 7.0 (3.5-14.0), p < 0.001           | 10 (3-37), p < 0.001                            |
| Cardiovascular disease                              | 7.7 (4.3-13.8), p < 0.001               | 9.0 (4.4-18.4), p < 0.001           | 4.0 (1.1-14.4), p < 0.031                       |
| Obesity                                             | 5.8 (3.1-11.0), p < 0.001               | 6.2 (2.9-13.1), p < 0.001           | 8.9 (2.5-31.8), p = 0.001                       |
| Remdesivir                                          | 5.0 (2.8-9.0), p < 0.001                | 4.4 (2.1-9.0), p < 0.001            | 11 (3-39), p < 0.001                            |
| Steroids (any administration of any steroid)        | 23 (10-52), p < 0.001                   | 14 (6-33), p < 0.001                | $+\infty$ ; * all infected patients + steroids  |
| Lack of COVID-19 vaccination                        | $+\infty$ ; * all infected patients     | $+\infty$ ; * all infected patients | $+\infty$ ; * all infected patients – vaccine   |

<sup>a</sup>The OR ranges correspond to 95% confidence intervals.  
\*The statistical significance and the OR range could not be calculated due to the lack of patients or only one patient in one of the categories.
